# Supplementary material for: Enhancing small-scale acetification processes using adsorbed Acetobacter pasteurianus UMCC 2951 on κ-carrageenan-coated luffa sponge
Source: PeerJ. 2024 Jun 28;12:e17650. doi: 10.7717/peerj.17650 (PMC11216191; doi:10.7717/peerj.17650)
Supplement: Supplemental Information 1 — Characteristics of LS as an adsorbent forA. pasteurianus UMCC 2951 in the semi-continuous acetification process [file peerj-12-17650-s001.xlsx]

## Sheet: Sheet1
	Raw data for preparation of the information presented in Tale 1
	LS number (Replication)	Weight (g)	True volume (cm3)	Bulk volume (cm3)	True density (g/cm3)	Bulk density (g/cm3)	Porosity (%)	Specific surface area (m2/g)
	Replication 1	1.7461	2.07	70.41	0.842	0.0248	61.2605	4.2903
	Replication 2	1.6574	2.04	66.56	0.8125	0.0249	56.8125	4.354
	Replication 3	1.695	2.05	70.33	0.825	0.0241	55.5318	4.0522
	Replication 4	1.7771	2.08	69.42	0.8524	0.0256	48.207	4.4382
	Replication 5	1.7528	2.08	72.43	0.8443	0.0242	54.1345	4.1842
	Replication 6	1.5678	2	63.73	0.7826	0.0246	53.8654	3.9177
	Replication 7	1.6931	2.05	67.45	0.8244	0.0251	54.862	4.1318
	Replication 8	1.6215	2.03	66.45	0.8005	0.0244	52.828	4.4165
	Replication 9	1.6246	2.03	66.31	0.8015	0.0245	55.0074	4.3557
	Replication 10	1.658	2.04	67.4	0.8127	0.0246	53.3877	4.0176
	Replication 11	1.6407	2.03	65.37	0.8069	0.0251	50.2611	4.4211
	Replication 12	1.7259	2.07	66.9	0.8353	0.0258	58.4771	4.2597
	Average	1.68	2.0475	67.73	0.820008	0.0248083	54.5529	4.23658
	SD	0.0626827	0.024168	2.45612	0.0209004	0.00052303	3.44341	0.174726
