# Supplementary material for: Enhancing small-scale acetification processes using adsorbed Acetobacter pasteurianus UMCC 2951 on κ-carrageenan-coated luffa sponge
Source: PeerJ. 2024 Jun 28;12:e17650. doi: 10.7717/peerj.17650 (PMC11216191; doi:10.7717/peerj.17650)
Supplement: Supplemental Information 2 — Comparative analysis of acetification processes using planktonic cells, LS-AAB, and LSK-AAB. [file peerj-12-17650-s002.xlsx]

## Sheet: Sheet1
	Raw data for preparation of the information presented in Tale 2
	Parameters	Planktonic cells			LS-AAB			LSK-AAB
		Rep1	Rep 2	Rep3	Rep1	Rep 2	Rep3	Rep1	Rep 2	Rep3
	Startup phase (d)	12	12	12	9	9	9	7	7	7
	Number of acetification cycles	2	2	2	4	4	4	5	5	5
	Acetification period (d)	8	8	8	5	5	5	4.2	4.2	4.2
	Final acetic acid (g/L)	54	54.3	53.7	57.25	56.85	57.65	59	58.6	59.4
	Acetic acid produced (g/L)	9	9.3	8.7	12.25	12.65	11.85	14	14.4	13.6
	Acetification rate (g/L∙d)	1.13	1.18	1.08	2.45	2.41	2.49	3.33	3.38	3.28
	Cell dry weight (mg/L)
	- Planktonic cells in medium	0.91	0.908	0.912	0.939	0.94	0.941	0.948	0.95	0.952
	- Absorbed cells	BS was not form.	BS was not form.	BS was not form.	2.36	2.44	2.4	3.43	3.57	3.5
	BC produced (mg/L)	BS was not form.	BS was not form.	BS was not form.	25	23	27	37	34	40
	Dissolved oxygen (ppm)	4.12	4.32	3.92	2.98	2.78	3.18	2.53	2.43	2.63
