# Supplementary material for: Enhancing small-scale acetification processes using adsorbed Acetobacter pasteurianus UMCC 2951 on κ-carrageenan-coated luffa sponge
Source: PeerJ. 2024 Jun 28;12:e17650. doi: 10.7717/peerj.17650 (PMC11216191; doi:10.7717/peerj.17650)
Supplement: Supplemental Information 3 — (A) Planktonic cells. (B) Cells adsorbed on luffa sponge (LS). (C) Cells adsorbed on luffa sponge coated κ-carrageenan (LSK). [file peerj-12-17650-s003.xlsx]

## Sheet: Figure 2 (a)
	Raw data for preparation of the information presented in Figure 2
	Figure 2 (a)
		Acidity-No LS			Ethanol-No LS
	Acetification period (d)	Replication 1	Replication 2	Replication 3	Replication 1	Replication 2	Replication 3
	0	45.305	44.771	45.038	35.351	34.371	36.33
	1	45.502	44.702	45.102	35.49	34.326	36.653
	3	45.088	45.014	45.051	35.223	33.998	36.447
	6	46.463	45.576	46.019	33.177	32.564	33.789
	9	46.467	45.667	46.067	30.443	29.463	31.422
	11	48.4483	47.782	48.115	7.017	6.159	7.874
	12	49.7993	48.867	49.333	5.009	4.09	5.927
	12	45.657	45.657	45.657	35.015	33.667	36.362
	13	45.3683	44.8357	45.102	35.012	34.019	36.004
	15	46.556	45.796	46.176	30.006	29.087	30.924
	17	48.2853	47.919	48.102	17.006	15.536	18.475
	19	49.6073	48.821	49.214	10.011	8.994	11.027
	20	53.415	52.815	53.115	2.003	1.133	2.872
	20	45.791	45.117	45.454	35.003	34.035	35.97
	21	46.8911	46.425	46.658	33.009	32.372	33.645
	23	49.641	48.961	49.301	28.006	26.671	29.34
	25	51.678	51.024	51.351	20.351	19.395	21.306
	27	53.83	53.15	53.49	12.49	11.399	13.58
	28	55.456	54.989	55.223	1.223	0.181	2.264
	28	46.61	45.744	46.177	35.177	34.148	36.205
	29	46.843	46.043	46.443	34.443	33.744	35.141
	30	47.357	46.677	47.017	30.017	28.755	31.278

## Sheet: Figure 2 (b)
	Raw data for preparation of the information presented in Figure 2
	Figure 2 (b)
		Acidity-LS-AAB			Ethanol-LS-AAB
	Acetification period (d)	Replication 1	Replication 2	Replication 3	Replication 1	Replication 2	Replication 3
	0	45.372	44.672	45.022	35.112	34.132	36.091
	1	45.666	44.933	45.3	35.117	33.647	36.586
	3	47.711	46.844	47.278	30.055	28.891	31.2185
	5	49.722	48.922	49.322	20.114	19.241	20.986
	7	50.568	50.075	50.322	10.024	8.762	11.285
	9	52.222	51.689	51.956	3.002	1.532	4.471
	9	45.188	44.855	45.022	35	33.162	36.837
	10	46.189	45.189	45.689	30.001	28.408	31.593
	12	49.652	48.925	49.289	24.046	23.433	24.658
	13	52.438	51.695	52.067	12.046	10.527	13.564
	14	55.171	54.904	55.038	2.046	0.784	3.307
	14	45.377	44.777	45.077	35.08	34.1	36.059
	15	47.417	46.736	47.077	29.409	28.306	30.5113
	16	49.5483	48.681	49.115	25.797	23.959	27.634
	17	52.606	52.006	52.306	18.281	16.933	19.628
	18	54.43	53.997	54.214	10.609	9.016	12.201
	19	62.542	62.075	62.309	1.303	0.2	2.405
	19	46.231	45.338	45.785	35.21	34.23	36.189
	20	47.549	46.949	47.249	30.194	28.234	32.153
	21	49.538	48.785	49.162	24.104	22.879	25.328
	22	50.44	49.907	50.174	14.049	13.069	15.028
	23	55.396	54.743	55.07	8.022	7.054	8.989
	24	56.785	56.452	56.619	0.006	1.733	1.745
	24	45.41	44.59	45	35.021	33.551	36.49
	25	49.345	48.672	49.009	30.027	29.086	30.967
	26	52.347	51.682	52.015	25.077	23.974	26.179
	27	53.53	53.026	53.278	15.084	13.491	16.676
	28	54.628	53.693	54.161	10.115	8.89	11.339
	29	56.511	55.979	56.245	0.107	0.995	1.209
	29	45.411	44.588	45	35.621	35.008	36.233
	30	47.926	47.296	47.611	30.153	28.56	31.745

## Sheet: Figure 2 (c)
	Raw data for preparation of the information presented in Figure 2
	Figure 2 (c)
		Acidity-LSK-AAB			Ethanol-LSK-AAB
	Acetification period (d)	Replication 1	Replication 2	Replication 3	Replication 1	Replication 2	Replication 3
	0	45.177	44.844	45.011	35.458	34.906	36.009
	1	45.481	44.548	45.015	30.422	28.462	32.381
	3	49.445	48.578	49.012	25.269	23.799	26.738
	5	51.412	50.812	51.112	15.153	13.438	16.867
	7	53.367	52.867	53.117	3.458	2.233	4.682
	7	45.421	44.688	45.055	35.422	34.442	36.401
	8	50.547	49.68	50.114	30.269	29.178	31.359
	9	56.224	55.824	56.024	20.009	19.029	20.988
	10	60.535	59.468	60.002	0.015	1.234	1.264
	10	45.296	44.703	45	35.012	33.174	36.849
	12	51.167	50.834	51.001	28.048	26.455	29.64
	13	57.298	56.794	57.046	18.123	16.653	19.592
	14	62.596	61.496	62.046	8.059	6.405	9.712
	15	65.526	64.566	65.046	0.022	0.835	0.879
	15	45.52	44.64	45.08	35.089	34.476	35.701
	16	48.929	47.889	48.409	30.115	28.277	31.952
	17	54.14	53.453	53.797	18.334	17.109	19.558
	18	56.607	55.954	56.281	10.657	9.187	12.126
	19	58.985	58.232	58.609	2.125	0.9	3.349
	19	45.819	44.786	45.303	35.183	33.799	36.566
	20	46.676	45.743	46.21	30.109	28.651	31.566
	21	50.72	49.667	50.194	21.224	20.133	22.314
	22	53.544	52.664	53.104	16.119	14.281	17.956
	23	56.379	55.719	56.049	0.48	0.377	1.337
	23	45.358	44.685	45.022	35.673	34.08	37.265
	24	46.449	45.562	46.006	30.31	28.901	31.718
	25	50.437	49.604	50.021	24.362	23.382	25.341
	26	52.433	51.62	52.027	18.51	16.918	20.102
	27	54.507	53.647	54.077	10.232	8.897	11.566
	28	56.364	55.803	56.084	0.179	1.043	1.401
	28	45.498	44.731	45.115	35.466	34.253	36.678
	29	48.507	47.707	48.107	30.017	28.179	31.854
	30	51.107	50.134	50.621	28.364	26.771	29.956
